# Supplementary material
Source: PubMed Central journal article supplement (PMC5074624)
Supplement: supp_pp.16.00460_PP2016-00460R2_Supplemental_Table_S1.pdf [file supp_pp.16.00460_PP2016-00460R2_Supplemental_Table_S1.pdf]

**Suppl. Table S1:** Changes in metabolite profiles in RAP2.12 and  $\Delta$ 13RAP2.12 overexpressing plants relative to wild-type (WT). Whole rosettes of 5-week-old plants were sampled into liquid nitrogen after 16 h incubation in normoxia or hypoxia in the dark without inclusion of sugars, before the material was extracted to analyse metabolite levels. Results are means  $\pm$  S.E. (n = 8-10 biological replicates) and expressed relative to the WT at 21% oxygen. Values of the different genotypes that significantly differ from each other are indicated by different letters (according to one-way ANOVA test, P < 0.05). Metabolites and metabolite ratios are listed in alphabetical order. A subset of these data is visualized in Figures 5A-C. Growth of plants and rosette stage analysed was similar as in Fig. 2.

| Substance                        | Mean $\pm$ Standard error <small>One-way ANOVA</small> |                               |                               |                              |                               |                               |
|----------------------------------|--------------------------------------------------------|-------------------------------|-------------------------------|------------------------------|-------------------------------|-------------------------------|
|                                  | Normoxia                                               |                               |                               | Hypoxia                      |                               |                               |
|                                  | WT                                                     | 35S::RAP2.12                  | 35S:: $\Delta$ 13RAP2.12      | WT                           | 35S::RAP2.12                  | 35S:: $\Delta$ 13RAP2.12      |
| 3,6-Dimethyl-2,5-piperazinedione | 1.00 $\pm$ 0.09 <sup>a</sup>                           | 1.06 $\pm$ 0.15 <sup>a</sup>  | 0.82 $\pm$ 0.07 <sup>a</sup>  | 0.95 $\pm$ 0.09 <sup>a</sup> | 0.76 $\pm$ 0.10 <sup>a</sup>  | 1.06 $\pm$ 0.08 <sup>a</sup>  |
| 1,6-Anhydroglucose               | 1.00 $\pm$ 0.12 <sup>a</sup>                           | 0.79 $\pm$ 0.11 <sup>a</sup>  | 1.02 $\pm$ 0.13 <sup>a</sup>  | 1.10 $\pm$ 0.07 <sup>a</sup> | 0.76 $\pm$ 0.10 <sup>a</sup>  | 1.07 $\pm$ 0.13 <sup>a</sup>  |
| 2-Aminobutyrate                  | 1.00 $\pm$ 0.12 <sup>a</sup>                           | 1.00 $\pm$ 0.12 <sup>a</sup>  | 4.43 $\pm$ 1.28 <sup>b</sup>  | 2.02 $\pm$ 0.10 <sup>a</sup> | 2.90 $\pm$ 0.41 <sup>a</sup>  | 4.85 $\pm$ 0.72 <sup>b</sup>  |
| 2-Deoxygalactose                 | 1.00 $\pm$ 0.26 <sup>a</sup>                           | 0.85 $\pm$ 0.24 <sup>a</sup>  | 1.17 $\pm$ 0.14 <sup>a</sup>  | 1.15 $\pm$ 0.18 <sup>a</sup> | 1.23 $\pm$ 0.14 <sup>a</sup>  | 1.76 $\pm$ 0.23 <sup>a</sup>  |
| 2-Deoxyribofuranose              | 1.00 $\pm$ 0.19 <sup>a</sup>                           | 1.01 $\pm$ 0.15 <sup>a</sup>  | 1.18 $\pm$ 0.12 <sup>a</sup>  | 1.17 $\pm$ 0.24 <sup>a</sup> | 1.06 $\pm$ 0.14 <sup>a</sup>  | 1.04 $\pm$ 0.11 <sup>a</sup>  |
| 2-Deoxyribose                    | 1.00 $\pm$ 0.20 <sup>a</sup>                           | 0.75 $\pm$ 0.20 <sup>a</sup>  | 0.61 $\pm$ 0.12 <sup>a</sup>  | 1.05 $\pm$ 0.16 <sup>a</sup> | 0.63 $\pm$ 0.17 <sup>a</sup>  | 0.71 $\pm$ 0.12 <sup>a</sup>  |
| 2-Deoxyribose 5-phosphate        | 1.00 $\pm$ 0.10 <sup>a</sup>                           | 0.71 $\pm$ 0.12 <sup>a</sup>  | 0.82 $\pm$ 0.09 <sup>a</sup>  | 1.04 $\pm$ 0.08 <sup>a</sup> | 0.79 $\pm$ 0.05 <sup>a</sup>  | 1.01 $\pm$ 0.11 <sup>a</sup>  |
| 2-Ketobutyrate                   | 1.00 $\pm$ 0.11 <sup>a</sup>                           | 0.70 $\pm$ 0.12 <sup>a</sup>  | 1.17 $\pm$ 0.16 <sup>a</sup>  | 1.18 $\pm$ 0.16 <sup>a</sup> | 0.82 $\pm$ 0.08 <sup>a</sup>  | 1.29 $\pm$ 0.19 <sup>a</sup>  |
| 2-Ketoisocaproic acid            | 1.00 $\pm$ 0.13 <sup>a</sup>                           | 0.74 $\pm$ 0.13 <sup>ab</sup> | 1.68 $\pm$ 0.26 <sup>ac</sup> | 2.27 $\pm$ 0.39 <sup>a</sup> | 2.15 $\pm$ 0.25 <sup>a</sup>  | 2.78 $\pm$ 0.40 <sup>a</sup>  |
| 3-Cyanoalanine                   | 1.00 $\pm$ 0.10 <sup>a</sup>                           | 0.97 $\pm$ 0.16 <sup>a</sup>  | 7.11 $\pm$ 1.43 <sup>b</sup>  | 1.48 $\pm$ 0.16 <sup>a</sup> | 2.83 $\pm$ 1.10 <sup>a</sup>  | 8.58 $\pm$ 0.96 <sup>b</sup>  |
| 3-Hydroxybutyrate                | 1.00 $\pm$ 0.17 <sup>a</sup>                           | 0.65 $\pm$ 0.07 <sup>ab</sup> | 1.16 $\pm$ 0.08 <sup>ac</sup> | 0.91 $\pm$ 0.07 <sup>a</sup> | 0.86 $\pm$ 0.09 <sup>ab</sup> | 1.21 $\pm$ 0.11 <sup>ac</sup> |
| 3-Ureidopropionic acid           | 1.00 $\pm$ 0.24 <sup>a</sup>                           | 0.56 $\pm$ 0.11 <sup>a</sup>  | 0.81 $\pm$ 0.20 <sup>a</sup>  | 1.12 $\pm$ 0.21 <sup>a</sup> | 0.63 $\pm$ 0.16 <sup>a</sup>  | 0.85 $\pm$ 0.15 <sup>a</sup>  |
| 4-Aminobenzoate                  | 1.00 $\pm$ 0.10 <sup>a</sup>                           | 0.80 $\pm$ 0.07 <sup>a</sup>  | 1.60 $\pm$ 0.16 <sup>b</sup>  | 1.17 $\pm$ 0.07 <sup>a</sup> | 1.27 $\pm$ 0.15 <sup>a</sup>  | 1.95 $\pm$ 0.19 <sup>b</sup>  |
| 5-Methylcytosine                 | 1.00 $\pm$ 0.30 <sup>a</sup>                           | 0.18 $\pm$ 0.07 <sup>a</sup>  | 3.79 $\pm$ 0.54 <sup>b</sup>  | 0.73 $\pm$ 0.16 <sup>a</sup> | 0.57 $\pm$ 0.37 <sup>a</sup>  | 6.95 $\pm$ 1.40 <sup>b</sup>  |
| 5-Oxoproline                     | 1.00 $\pm$ 0.42 <sup>a</sup>                           | 0.38 $\pm$ 0.10 <sup>a</sup>  | 2.23 $\pm$ 0.30 <sup>b</sup>  | 1.12 $\pm$ 0.23 <sup>a</sup> | 1.09 $\pm$ 0.33 <sup>a</sup>  | 3.10 $\pm$ 0.26 <sup>b</sup>  |
| Agmatine                         | 1.00 $\pm$ 0.12 <sup>a</sup>                           | 0.60 $\pm$ 0.09 <sup>ab</sup> | 1.32 $\pm$ 0.24 <sup>ac</sup> | 0.88 $\pm$ 0.08 <sup>a</sup> | 0.70 $\pm$ 0.08 <sup>a</sup>  | 1.41 $\pm$ 0.15 <sup>b</sup>  |
| Alanine                          | 1.00 $\pm$ 0.06 <sup>a</sup>                           | 0.77 $\pm$ 0.08 <sup>a</sup>  | 3.49 $\pm$ 0.45 <sup>b</sup>  | 2.74 $\pm$ 0.13 <sup>a</sup> | 4.62 $\pm$ 0.58 <sup>a</sup>  | 8.17 $\pm$ 1.06 <sup>b</sup>  |
| Arabinonate                      | 1.00 $\pm$ 0.18 <sup>a</sup>                           | 1.23 $\pm$ 0.23 <sup>a</sup>  | 1.25 $\pm$ 0.39 <sup>a</sup>  | 1.11 $\pm$ 0.33 <sup>a</sup> | 1.38 $\pm$ 0.20 <sup>ab</sup> | 0.20 $\pm$ 0.13 <sup>ac</sup> |
| Arginine                         | 1.00 $\pm$ 0.20 <sup>a</sup>                           | 0.82 $\pm$ 0.18 <sup>a</sup>  | 7.83 $\pm$ 0.86 <sup>b</sup>  | 1.41 $\pm$ 0.22 <sup>a</sup> | 2.00 $\pm$ 0.82 <sup>a</sup>  | 9.92 $\pm$ 1.55 <sup>b</sup>  |
| Ascorbate                        | 1.00 $\pm$ 0.16 <sup>a</sup>                           | 0.59 $\pm$ 0.11 <sup>ab</sup> | 0.38 $\pm$ 0.08 <sup>b</sup>  | 1.06 $\pm$ 0.12 <sup>a</sup> | 0.95 $\pm$ 0.18 <sup>a</sup>  | 0.37 $\pm$ 0.08 <sup>b</sup>  |
| Asparagine                       | 1.00 $\pm$ 0.35 <sup>a</sup>                           | 0.49 $\pm$ 0.13 <sup>ab</sup> | 1.72 $\pm$ 0.38 <sup>ac</sup> | 0.90 $\pm$ 0.17 <sup>a</sup> | 0.72 $\pm$ 0.17 <sup>a</sup>  | 1.96 $\pm$ 0.34 <sup>b</sup>  |
| Aspartic acid                    | 1.00 $\pm$ 0.08 <sup>a</sup>                           | 0.88 $\pm$ 0.06 <sup>a</sup>  | 2.32 $\pm$ 0.15 <sup>b</sup>  | 1.34 $\pm$ 0.11 <sup>a</sup> | 1.45 $\pm$ 0.12 <sup>a</sup>  | 2.51 $\pm$ 0.09 <sup>b</sup>  |
| beta-Alanine                     | 1.00 $\pm$ 0.06 <sup>a</sup>                           | 0.66 $\pm$ 0.08 <sup>a</sup>  | 3.94 $\pm$ 0.90 <sup>b</sup>  | 1.59 $\pm$ 0.15 <sup>a</sup> | 2.42 $\pm$ 0.81 <sup>a</sup>  | 6.19 $\pm$ 1.04 <sup>b</sup>  |
| cis-Sinapic acid                 | 1.00 $\pm$ 0.08 <sup>a</sup>                           | 0.77 $\pm$ 0.11 <sup>a</sup>  | 0.95 $\pm$ 0.18 <sup>a</sup>  | 1.24 $\pm$ 0.10 <sup>a</sup> | 1.18 $\pm$ 0.09 <sup>a</sup>  | 1.12 $\pm$ 0.13 <sup>a</sup>  |
| Citrate                          | 1.00 $\pm$ 0.27 <sup>a</sup>                           | 0.96 $\pm$ 0.14 <sup>a</sup>  | 3.18 $\pm$ 0.39 <sup>b</sup>  | 0.78 $\pm$ 0.16 <sup>a</sup> | 1.78 $\pm$ 0.36 <sup>a</sup>  | 4.06 $\pm$ 0.47 <sup>b</sup>  |
| cyclo-Serine                     | 1.00 $\pm$ 0.07 <sup>a</sup>                           | 0.75 $\pm$ 0.04 <sup>a</sup>  | 2.22 $\pm$ 0.17 <sup>b</sup>  | 1.43 $\pm$ 0.07 <sup>a</sup> | 1.31 $\pm$ 0.25 <sup>a</sup>  | 3.12 $\pm$ 0.24 <sup>b</sup>  |
| Cytosine                         | 1.00 $\pm$ 0.13 <sup>a</sup>                           | 1.05 $\pm$ 0.17 <sup>a</sup>  | 11.89 $\pm$ 2.15 <sup>b</sup> | 1.46 $\pm$ 0.18 <sup>a</sup> | 3.55 $\pm$ 1.97 <sup>a</sup>  | 17.16 $\pm$ 1.96 <sup>b</sup> |
| Dehydroascorbate                 | 1.00 $\pm$ 0.26 <sup>a</sup>                           | 0.48 $\pm$ 0.10 <sup>ab</sup> | 0.26 $\pm$ 0.07 <sup>b</sup>  | 0.89 $\pm$ 0.16 <sup>a</sup> | 0.81 $\pm$ 0.19 <sup>ab</sup> | 0.29 $\pm$ 0.05 <sup>b</sup>  |
| D-Glucopyranose                  | 1.00 $\pm$ 0.37 <sup>a</sup>                           | 0.31 $\pm$ 0.16 <sup>a</sup>  | 0.23 $\pm$ 0.07 <sup>a</sup>  | 1.43 $\pm$ 0.59 <sup>a</sup> | 0.39 $\pm$ 0.10 <sup>a</sup>  | 0.31 $\pm$ 0.07 <sup>a</sup>  |
| Dihydroxyacetone                 | 1.00 $\pm$ 0.08 <sup>a</sup>                           | 0.76 $\pm$ 0.15 <sup>a</sup>  | 1.33 $\pm$ 0.37 <sup>a</sup>  | 1.08 $\pm$ 0.09 <sup>a</sup> | 0.91 $\pm$ 0.10 <sup>a</sup>  | 1.16 $\pm$ 0.23 <sup>a</sup>  |
| D-Xylobiose                      | 1.00 $\pm$ 0.22 <sup>a</sup>                           | 1.36 $\pm$ 0.67 <sup>a</sup>  | 0.21 $\pm$ 0.03 <sup>a</sup>  | 0.94 $\pm$ 0.26 <sup>a</sup> | 0.29 $\pm$ 0.06 <sup>b</sup>  | 0.17 $\pm$ 0.02 <sup>b</sup>  |
| Erythritol                       | 1.00 $\pm$ 0.10 <sup>a</sup>                           | 0.85 $\pm$ 0.09 <sup>a</sup>  | 1.76 $\pm$ 0.12 <sup>b</sup>  | 1.11 $\pm$ 0.08 <sup>a</sup> | 1.22 $\pm$ 0.11 <sup>a</sup>  | 1.81 $\pm$ 0.16 <sup>b</sup>  |
| Ethanolamine                     | 1.00 $\pm$ 0.15 <sup>a</sup>                           | 0.92 $\pm$ 0.08 <sup>a</sup>  | 1.84 $\pm$ 0.31 <sup>b</sup>  | 0.73 $\pm$ 0.13 <sup>a</sup> | 1.43 $\pm$ 0.16 <sup>ab</sup> | 2.12 $\pm$ 0.32 <sup>b</sup>  |
| Fructose                         | 1.00 $\pm$ 0.15 <sup>a</sup>                           | 0.64 $\pm$ 0.13 <sup>a</sup>  | 1.24 $\pm$ 0.34 <sup>a</sup>  | 4.12 $\pm$ 0.84 <sup>a</sup> | 2.63 $\pm$ 0.47 <sup>a</sup>  | 1.93 $\pm$ 0.47 <sup>a</sup>  |
| Fructose 6-phosphate             | 1.00 $\pm$ 0.15 <sup>a</sup>                           | 0.72 $\pm$ 0.12 <sup>ab</sup> | 1.37 $\pm$ 0.12 <sup>ac</sup> | 0.53 $\pm$ 0.05 <sup>a</sup> | 1.35 $\pm$ 0.21 <sup>a</sup>  | 3.12 $\pm$ 0.55 <sup>b</sup>  |
| Fucose                           | 1.00 $\pm$ 0.04 <sup>a</sup>                           | 0.91 $\pm$ 0.07 <sup>a</sup>  | 2.15 $\pm$ 0.80 <sup>a</sup>  | 1.03 $\pm$ 0.04 <sup>a</sup> | 0.86 $\pm$ 0.06 <sup>ab</sup> | 1.23 $\pm$ 0.07 <sup>ac</sup> |
| Fumarate                         | 1.00 $\pm$ 0.20 <sup>a</sup>                           | 0.66 $\pm$ 0.13 <sup>a</sup>  | 0.58 $\pm$ 0.13 <sup>a</sup>  | 0.82 $\pm$ 0.13 <sup>a</sup> | 0.93 $\pm$ 0.25 <sup>a</sup>  | 0.76 $\pm$ 0.14 <sup>a</sup>  |
| GABA                             | 1.00 $\pm$ 0.22 <sup>a</sup>                           | 0.55 $\pm$ 0.07 <sup>a</sup>  | 3.36 $\pm$ 0.79 <sup>b</sup>  | 0.81 $\pm$ 0.07 <sup>a</sup> | 1.26 $\pm$ 0.51 <sup>a</sup>  | 6.26 $\pm$ 0.97 <sup>b</sup>  |
| Galactinol                       | 1.00 $\pm$ 0.27 <sup>a</sup>                           | 0.61 $\pm$ 0.22 <sup>ab</sup> | 0.13 $\pm$ 0.07 <sup>b</sup>  | 0.91 $\pm$ 0.31 <sup>a</sup> | 0.24 $\pm$ 0.08 <sup>a</sup>  | 0.17 $\pm$ 0.04 <sup>a</sup>  |
| Galactonate                      | 1.00 $\pm$ 0.08 <sup>a</sup>                           | 0.83 $\pm$ 0.09 <sup>a</sup>  | 0.89 $\pm$ 0.07 <sup>a</sup>  | 1.05 $\pm$ 0.07 <sup>a</sup> | 1.02 $\pm$ 0.09 <sup>a</sup>  | 1.03 $\pm$ 0.09 <sup>a</sup>  |
| Galactose                        | 1.00 $\pm$ 0.15 <sup>a</sup>                           | 0.70 $\pm$ 0.14 <sup>a</sup>  | 0.52 $\pm$ 0.08 <sup>a</sup>  | 0.97 $\pm$ 0.14 <sup>a</sup> | 0.51 $\pm$ 0.06 <sup>b</sup>  | 0.58 $\pm$ 0.08 <sup>b</sup>  |
| Galactose 6-phosphate            | 1.00 $\pm$ 0.10 <sup>a</sup>                           | 0.82 $\pm$ 0.06 <sup>a</sup>  | 2.60 $\pm$ 0.52 <sup>b</sup>  | 1.28 $\pm$ 0.15 <sup>a</sup> | 1.98 $\pm$ 0.25 <sup>ab</sup> | 2.92 $\pm$ 0.43 <sup>b</sup>  |
| Gentiobiose                      | 1.00 $\pm$ 0.17 <sup>a</sup>                           | 0.48 $\pm$ 0.11 <sup>a</sup>  | 0.84 $\pm$ 0.33 <sup>a</sup>  | 1.31 $\pm$ 0.21 <sup>a</sup> | 0.47 $\pm$ 0.17 <sup>b</sup>  | 0.85 $\pm$ 0.32 <sup>ab</sup> |
| Glucarate-1,4-lactone            | 1.00 $\pm$ 0.20 <sup>a</sup>                           | 0.69 $\pm$ 0.06 <sup>ab</sup> | 0.26 $\pm$ 0.12 <sup>b</sup>  | 1.12 $\pm$ 0.09 <sup>a</sup> | 1.53 $\pm$ 0.21 <sup>a</sup>  | 0.40 $\pm$ 0.15 <sup>b</sup>  |
| Glucoheptose                     | 1.00 $\pm$ 0.15 <sup>a</sup>                           | 0.68 $\pm$ 0.20 <sup>a</sup>  | 0.54 $\pm$ 0.14 <sup>a</sup>  | 1.32 $\pm$ 0.16 <sup>a</sup> | 0.88 $\pm$ 0.15 <sup>a</sup>  | 0.82 $\pm$ 0.19 <sup>a</sup>  |
| Gluconate                        | 1.00 $\pm$ 0.16 <sup>a</sup>                           | 0.78 $\pm$ 0.08 <sup>a</sup>  | 6.18 $\pm$ 1.34 <sup>b</sup>  | 1.10 $\pm$ 0.19 <sup>a</sup> | 3.14 $\pm$ 2.39 <sup>ab</sup> | 10.18 $\pm$ 2.51 <sup>b</sup> |
| Glucose                          | 1.00 $\pm$ 0.29 <sup>a</sup>                           | 0.67 $\pm$ 0.25 <sup>a</sup>  | 0.21 $\pm$ 0.08 <sup>a</sup>  | 0.98 $\pm$ 0.30 <sup>a</sup> | 0.27 $\pm$ 0.06 <sup>b</sup>  | 0.18 $\pm$ 0.03 <sup>b</sup>  |
| Glucose 6-phosphate              | 1.00 $\pm$ 0.32 <sup>a</sup>                           | 0.53 $\pm$ 0.10 <sup>a</sup>  | 0.76 $\pm$ 0.36 <sup>a</sup>  | 1.02 $\pm$ 0.20 <sup>a</sup> | 0.85 $\pm$ 0.23 <sup>a</sup>  | 0.97 $\pm$ 0.25 <sup>a</sup>  |
| Glutamic acid                    | 1.00 $\pm$ 0.05 <sup>a</sup>                           | 0.77 $\pm$ 0.05 <sup>a</sup>  | 1.38 $\pm$ 0.08 <sup>b</sup>  | 0.92 $\pm$ 0.03 <sup>a</sup> | 1.02 $\pm$ 0.10 <sup>a</sup>  | 1.84 $\pm$ 0.24 <sup>b</sup>  |
| Glutamine                        | 1.00 $\pm$ 0.34 <sup>a</sup>                           | 0.46 $\pm$ 0.16 <sup>a</sup>  | 2.19 $\pm$ 0.35 <sup>b</sup>  | 1.41 $\pm$ 0.27 <sup>a</sup> | 1.17 $\pm$ 0.29 <sup>a</sup>  | 3.11 $\pm$ 0.43 <sup>b</sup>  |
| Glutarate                        | 1.00 $\pm$ 0.22 <sup>a</sup>                           | 0.83 $\pm$ 0.27 <sup>a</sup>  | 0.90 $\pm$ 0.27 <sup>a</sup>  | 1.39 $\pm$ 0.31 <sup>a</sup> | 1.19 $\pm$ 0.27 <sup>a</sup>  | 1.39 $\pm$ 0.61 <sup>a</sup>  |
| Glycerate                        | 1.00 $\pm$ 0.16 <sup>a</sup>                           | 0.81 $\pm$ 0.10 <sup>a</sup>  | 1.33 $\pm$ 0.16 <sup>a</sup>  | 1.04 $\pm$ 0.15 <sup>a</sup> | 1.22 $\pm$ 0.18 <sup>ab</sup> | 1.99 $\pm$ 0.32 <sup>b</sup>  |
| Glycerol                         | 1.00 $\pm$ 0.12 <sup>a</sup>                           | 0.91 $\pm$ 0.09 <sup>a</sup>  | 1.48 $\pm$ 0.24 <sup>a</sup>  | 0.81 $\pm$ 0.11 <sup>a</sup> | 1.12 $\pm$ 0.11 <sup>a</sup>  | 1.97 $\pm$ 0.29 <sup>b</sup>  |
| Glycerol 3-phosphate             | 1.00 $\pm$ 0.14 <sup>a</sup>                           | 0.55 $\pm$ 0.07 <sup>b</sup>  | 0.78 $\pm$ 0.07 <sup>ab</sup> | 0.78 $\pm$ 0.03 <sup>a</sup> | 0.69 $\pm$ 0.06 <sup>a</sup>  | 1.31 $\pm$ 0.21 <sup>b</sup>  |
| Glycerophosphoglycerol           | 1.00 $\pm$ 0.24 <sup>a</sup>                           | 0.47 $\pm$ 0.08 <sup>a</sup>  | 0.76 $\pm$ 0.18 <sup>a</sup>  | 0.94 $\pm$ 0.11 <sup>a</sup> | 0.64 $\pm$ 0.16 <sup>a</sup>  | 0.57 $\pm$ 0.12 <sup>a</sup>  |

|                                        |                          |                           |                           |                          |                           |                           |
|----------------------------------------|--------------------------|---------------------------|---------------------------|--------------------------|---------------------------|---------------------------|
| Glycine                                | 1.00 ± 0.37 <sup>a</sup> | 0.45 ± 0.05 <sup>ab</sup> | 1.53 ± 0.32 <sup>ac</sup> | 1.16 ± 0.11 <sup>a</sup> | 1.64 ± 0.17 <sup>ab</sup> | 2.23 ± 0.23 <sup>b</sup>  |
| Helicin                                | 1.00 ± 0.09 <sup>a</sup> | 0.88 ± 0.08 <sup>ab</sup> | 0.63 ± 0.06 <sup>b</sup>  | 0.98 ± 0.07 <sup>a</sup> | 0.94 ± 0.09 <sup>a</sup>  | 0.80 ± 0.15 <sup>a</sup>  |
| Homoserine                             | 1.00 ± 0.37 <sup>a</sup> | 1.24 ± 0.25 <sup>a</sup>  | 2.12 ± 0.43 <sup>a</sup>  | 1.41 ± 0.43 <sup>a</sup> | 1.03 ± 0.22 <sup>a</sup>  | 1.38 ± 0.33 <sup>a</sup>  |
| Isoleucine                             | 1.00 ± 0.11 <sup>a</sup> | 0.86 ± 0.09 <sup>ab</sup> | 1.42 ± 0.19 <sup>ac</sup> | 1.12 ± 0.08 <sup>a</sup> | 1.12 ± 0.09 <sup>a</sup>  | 1.39 ± 0.21 <sup>a</sup>  |
| Isomaltose                             | 1.00 ± 0.18 <sup>a</sup> | 0.86 ± 0.19 <sup>a</sup>  | 0.83 ± 0.37 <sup>a</sup>  | 1.07 ± 0.19 <sup>a</sup> | 0.82 ± 0.17 <sup>a</sup>  | 0.62 ± 0.24 <sup>a</sup>  |
| Lactate                                | 1.00 ± 0.07 <sup>a</sup> | 0.90 ± 0.08 <sup>ab</sup> | 1.73 ± 0.37 <sup>ac</sup> | 1.14 ± 0.18 <sup>a</sup> | 2.98 ± 1.14 <sup>ab</sup> | 6.43 ± 1.44 <sup>b</sup>  |
| Leucine                                | 1.00 ± 0.12 <sup>a</sup> | 0.82 ± 0.11 <sup>a</sup>  | 3.02 ± 0.43 <sup>b</sup>  | 1.35 ± 0.14 <sup>a</sup> | 1.49 ± 0.39 <sup>a</sup>  | 4.38 ± 0.61 <sup>b</sup>  |
| Lysine                                 | 1.00 ± 0.18 <sup>a</sup> | 0.79 ± 0.15 <sup>a</sup>  | 2.31 ± 0.35 <sup>b</sup>  | 0.80 ± 0.10 <sup>a</sup> | 0.85 ± 0.15 <sup>a</sup>  | 2.26 ± 0.27 <sup>b</sup>  |
| Malate                                 | 1.00 ± 0.26 <sup>a</sup> | 0.65 ± 0.13 <sup>ab</sup> | 1.83 ± 0.34 <sup>ac</sup> | 0.76 ± 0.14 <sup>a</sup> | 1.41 ± 0.45 <sup>a</sup>  | 3.87 ± 1.10 <sup>b</sup>  |
| Maltitol                               | 1.00 ± 0.21 <sup>a</sup> | 0.82 ± 0.39 <sup>a</sup>  | 0.04 ± 0.03 <sup>a</sup>  | 0.83 ± 0.31 <sup>a</sup> | 0.14 ± 0.09 <sup>a</sup>  | 0.07 ± 0.07 <sup>a</sup>  |
| Maltose                                | 1.00 ± 0.11 <sup>a</sup> | 0.87 ± 0.09 <sup>ab</sup> | 0.64 ± 0.02 <sup>b</sup>  | 1.07 ± 0.08 <sup>a</sup> | 1.02 ± 0.08 <sup>a</sup>  | 1.16 ± 0.18 <sup>a</sup>  |
| Mannose                                | 1.00 ± 0.13 <sup>a</sup> | 0.58 ± 0.14 <sup>a</sup>  | 0.54 ± 0.11 <sup>a</sup>  | 1.43 ± 0.21 <sup>a</sup> | 0.71 ± 0.12 <sup>b</sup>  | 0.65 ± 0.11 <sup>b</sup>  |
| Mannose 1-phosphate                    | 1.00 ± 0.11 <sup>a</sup> | 0.51 ± 0.09 <sup>ab</sup> | 1.34 ± 0.22 <sup>ac</sup> | 1.49 ± 0.13 <sup>a</sup> | 1.24 ± 0.18 <sup>a</sup>  | 1.66 ± 0.22 <sup>a</sup>  |
| Mannose 6-phosphate                    | 1.00 ± 0.12 <sup>a</sup> | 1.02 ± 0.14 <sup>a</sup>  | 0.75 ± 0.30 <sup>a</sup>  | 1.61 ± 0.28 <sup>a</sup> | 2.13 ± 0.38 <sup>a</sup>  | 3.03 ± 0.82 <sup>a</sup>  |
| Melibiose                              | 1.00 ± 0.29 <sup>a</sup> | 0.65 ± 0.25 <sup>ab</sup> | 0.08 ± 0.08 <sup>b</sup>  | 0.67 ± 0.29 <sup>a</sup> | 0.12 ± 0.05 <sup>a</sup>  | 0.04 ± 0.04 <sup>a</sup>  |
| Methionine                             | 1.00 ± 0.08 <sup>a</sup> | 0.71 ± 0.05 <sup>a</sup>  | 2.93 ± 0.31 <sup>b</sup>  | 1.51 ± 0.08 <sup>a</sup> | 1.84 ± 0.23 <sup>a</sup>  | 3.78 ± 0.42 <sup>b</sup>  |
| Monomethylphosphate                    | 1.00 ± 0.20 <sup>a</sup> | 0.68 ± 0.09 <sup>a</sup>  | 1.34 ± 0.25 <sup>a</sup>  | 0.80 ± 0.08 <sup>a</sup> | 0.91 ± 0.11 <sup>a</sup>  | 1.85 ± 0.36 <sup>b</sup>  |
| myo-Inositol                           | 1.00 ± 0.08 <sup>a</sup> | 0.84 ± 0.15 <sup>a</sup>  | 0.41 ± 0.03 <sup>b</sup>  | 1.05 ± 0.05 <sup>a</sup> | 0.92 ± 0.13 <sup>a</sup>  | 0.55 ± 0.05 <sup>b</sup>  |
| N-Acetylmannosamine                    | 1.00 ± 0.08 <sup>a</sup> | 0.84 ± 0.10 <sup>a</sup>  | 0.83 ± 0.06 <sup>a</sup>  | 1.10 ± 0.07 <sup>a</sup> | 0.83 ± 0.06 <sup>b</sup>  | 0.91 ± 0.07 <sup>ab</sup> |
| N-Acetylneuramate                      | 1.00 ± 0.11 <sup>a</sup> | 0.76 ± 0.14 <sup>ab</sup> | 0.44 ± 0.12 <sup>b</sup>  | 1.09 ± 0.10 <sup>a</sup> | 1.03 ± 0.19 <sup>a</sup>  | 0.23 ± 0.12 <sup>b</sup>  |
| Nicotinamide                           | 1.00 ± 0.09 <sup>a</sup> | 0.92 ± 0.09 <sup>a</sup>  | 1.30 ± 0.17 <sup>a</sup>  | 0.99 ± 0.08 <sup>a</sup> | 1.04 ± 0.10 <sup>a</sup>  | 1.33 ± 0.17 <sup>a</sup>  |
| Nicotinate                             | 1.00 ± 0.16 <sup>a</sup> | 0.78 ± 0.14 <sup>a</sup>  | 1.88 ± 0.28 <sup>b</sup>  | 0.93 ± 0.15 <sup>a</sup> | 1.18 ± 0.30 <sup>a</sup>  | 2.76 ± 0.33 <sup>b</sup>  |
| O-Acetylserine                         | 1.00 ± 0.11 <sup>a</sup> | 0.70 ± 0.08 <sup>a</sup>  | 2.22 ± 0.25 <sup>b</sup>  | 0.75 ± 0.03 <sup>a</sup> | 1.02 ± 0.30 <sup>a</sup>  | 3.15 ± 0.39 <sup>b</sup>  |
| Ornithine                              | 1.00 ± 0.32 <sup>a</sup> | 0.74 ± 0.25 <sup>a</sup>  | 8.43 ± 2.21 <sup>b</sup>  | 1.45 ± 0.40 <sup>a</sup> | 1.25 ± 0.48 <sup>a</sup>  | 8.23 ± 1.90 <sup>b</sup>  |
| Ornithine-1,5-lactam                   | 1.00 ± 0.09 <sup>a</sup> | 0.87 ± 0.08 <sup>a</sup>  | 7.22 ± 0.76 <sup>b</sup>  | 1.20 ± 0.11 <sup>a</sup> | 2.02 ± 0.92 <sup>a</sup>  | 9.15 ± 1.24 <sup>b</sup>  |
| Phenylalanine                          | 1.00 ± 0.12 <sup>a</sup> | 0.78 ± 0.09 <sup>a</sup>  | 2.14 ± 0.30 <sup>b</sup>  | 1.29 ± 0.10 <sup>a</sup> | 1.22 ± 0.16 <sup>a</sup>  | 2.69 ± 0.33 <sup>b</sup>  |
| Phosphogluconate                       | 1.00 ± 0.19 <sup>a</sup> | 1.24 ± 0.52 <sup>a</sup>  | 0.33 ± 0.04 <sup>a</sup>  | 0.92 ± 0.20 <sup>a</sup> | 0.40 ± 0.07 <sup>b</sup>  | 0.38 ± 0.06 <sup>b</sup>  |
| Picolinate                             | 1.00 ± 0.11 <sup>a</sup> | 0.81 ± 0.08 <sup>a</sup>  | 1.85 ± 0.33 <sup>b</sup>  | 1.15 ± 0.10 <sup>a</sup> | 1.44 ± 0.19 <sup>a</sup>  | 2.18 ± 0.25 <sup>b</sup>  |
| Pipecolic acid                         | 1.00 ± 0.20 <sup>a</sup> | 0.68 ± 0.17 <sup>a</sup>  | 8.31 ± 2.75 <sup>b</sup>  | 1.95 ± 0.22 <sup>a</sup> | 2.63 ± 1.01 <sup>a</sup>  | 17.69 ± 7.43 <sup>b</sup> |
| Proline                                | 1.00 ± 0.36 <sup>a</sup> | 0.44 ± 0.13 <sup>a</sup>  | 2.65 ± 0.49 <sup>b</sup>  | 1.49 ± 0.23 <sup>a</sup> | 1.88 ± 1.13 <sup>a</sup>  | 7.61 ± 1.24 <sup>b</sup>  |
| Putrescine                             | 1.00 ± 0.16 <sup>a</sup> | 0.60 ± 0.06 <sup>b</sup>  | 0.76 ± 0.03 <sup>ab</sup> | 1.35 ± 0.15 <sup>a</sup> | 0.89 ± 0.05 <sup>b</sup>  | 1.07 ± 0.04 <sup>ab</sup> |
| Pyruvate                               | 1.00 ± 0.09 <sup>a</sup> | 0.88 ± 0.12 <sup>a</sup>  | 2.04 ± 0.30 <sup>b</sup>  | 1.11 ± 0.08 <sup>a</sup> | 2.03 ± 0.52 <sup>ab</sup> | 3.91 ± 0.89 <sup>b</sup>  |
| Raffinose                              | 1.00 ± 0.16 <sup>a</sup> | 0.39 ± 0.15 <sup>b</sup>  | 0.13 ± 0.09 <sup>b</sup>  | 2.06 ± 0.73 <sup>a</sup> | 0.36 ± 0.14 <sup>b</sup>  | 0.11 ± 0.05 <sup>b</sup>  |
| Ribose                                 | 1.00 ± 0.05 <sup>a</sup> | 0.90 ± 0.05 <sup>ab</sup> | 0.76 ± 0.08 <sup>b</sup>  | 0.88 ± 0.04 <sup>a</sup> | 0.74 ± 0.05 <sup>ab</sup> | 0.65 ± 0.06 <sup>b</sup>  |
| Salicin                                | 1.00 ± 0.11 <sup>a</sup> | 0.94 ± 0.14 <sup>a</sup>  | 1.23 ± 0.16 <sup>a</sup>  | 1.09 ± 0.08 <sup>a</sup> | 1.12 ± 0.10 <sup>a</sup>  | 1.41 ± 0.17 <sup>a</sup>  |
| Salicylic acid glucoside               | 1.00 ± 0.10 <sup>a</sup> | 0.92 ± 0.14 <sup>a</sup>  | 4.09 ± 1.56 <sup>a</sup>  | 1.24 ± 0.10 <sup>a</sup> | 1.52 ± 0.35 <sup>a</sup>  | 5.85 ± 1.29 <sup>b</sup>  |
| Secologanin                            | 1.00 ± 0.15 <sup>a</sup> | 0.72 ± 0.11 <sup>a</sup>  | 0.59 ± 0.17 <sup>a</sup>  | 0.82 ± 0.06 <sup>a</sup> | 0.56 ± 0.10 <sup>a</sup>  | 0.51 ± 0.12 <sup>a</sup>  |
| Serine                                 | 1.00 ± 0.08 <sup>a</sup> | 0.65 ± 0.07 <sup>a</sup>  | 1.59 ± 0.17 <sup>b</sup>  | 1.61 ± 0.11 <sup>a</sup> | 1.59 ± 0.18 <sup>a</sup>  | 2.98 ± 0.34 <sup>b</sup>  |
| Shikimate                              | 1.00 ± 0.09 <sup>a</sup> | 0.87 ± 0.08 <sup>a</sup>  | 1.11 ± 0.12 <sup>a</sup>  | 1.46 ± 0.09 <sup>a</sup> | 1.57 ± 0.11 <sup>a</sup>  | 1.42 ± 0.10 <sup>a</sup>  |
| Spermidine                             | 1.00 ± 0.18 <sup>a</sup> | 1.02 ± 0.19 <sup>a</sup>  | 1.42 ± 0.30 <sup>a</sup>  | 1.17 ± 0.16 <sup>a</sup> | 1.13 ± 0.20 <sup>a</sup>  | 1.11 ± 0.26 <sup>a</sup>  |
| Starch                                 | 1.00 ± 0.10 <sup>a</sup> | 0.80 ± 0.10 <sup>ab</sup> | 0.52 ± 0.10 <sup>b</sup>  | 1.48 ± 0.10 <sup>a</sup> | 1.02 ± 0.10 <sup>ab</sup> | 0.51 ± 0.04 <sup>b</sup>  |
| Succinate                              | 1.00 ± 0.25 <sup>a</sup> | 0.72 ± 0.17 <sup>a</sup>  | 1.10 ± 0.16 <sup>a</sup>  | 0.92 ± 0.19 <sup>a</sup> | 0.99 ± 0.20 <sup>a</sup>  | 1.36 ± 0.16 <sup>a</sup>  |
| Sucrose                                | 1.00 ± 0.08 <sup>a</sup> | 0.85 ± 0.06 <sup>a</sup>  | 0.79 ± 0.11 <sup>a</sup>  | 1.36 ± 0.09 <sup>a</sup> | 1.47 ± 0.09 <sup>a</sup>  | 2.14 ± 0.42 <sup>a</sup>  |
| Threonate                              | 1.00 ± 0.16 <sup>a</sup> | 0.87 ± 0.09 <sup>a</sup>  | 1.22 ± 0.12 <sup>a</sup>  | 0.96 ± 0.09 <sup>a</sup> | 1.02 ± 0.11 <sup>a</sup>  | 1.45 ± 0.20 <sup>a</sup>  |
| Threonine                              | 1.00 ± 0.07 <sup>a</sup> | 0.75 ± 0.04 <sup>a</sup>  | 2.23 ± 0.18 <sup>b</sup>  | 1.43 ± 0.07 <sup>a</sup> | 1.32 ± 0.25 <sup>a</sup>  | 3.15 ± 0.24 <sup>b</sup>  |
| Threose                                | 1.00 ± 0.11 <sup>a</sup> | 0.76 ± 0.07 <sup>a</sup>  | 3.46 ± 0.30 <sup>b</sup>  | 1.67 ± 0.10 <sup>a</sup> | 2.34 ± 0.50 <sup>a</sup>  | 4.07 ± 0.39 <sup>b</sup>  |
| trans-1,2-Cyclohexanedicarboxylic acid | 1.00 ± 0.30 <sup>a</sup> | 0.90 ± 0.39 <sup>a</sup>  | 0.68 ± 0.15 <sup>a</sup>  | 0.98 ± 0.27 <sup>a</sup> | 0.66 ± 0.16 <sup>a</sup>  | 1.01 ± 0.32 <sup>a</sup>  |
| Trehalose                              | 1.00 ± 0.08 <sup>a</sup> | 0.81 ± 0.13 <sup>a</sup>  | 0.71 ± 0.16 <sup>a</sup>  | 0.87 ± 0.10 <sup>a</sup> | 0.67 ± 0.09 <sup>a</sup>  | 0.72 ± 0.08 <sup>a</sup>  |
| Tryptophan                             | 1.00 ± 0.17 <sup>a</sup> | 0.52 ± 0.11 <sup>ab</sup> | 1.66 ± 0.44 <sup>ac</sup> | 1.47 ± 0.29 <sup>a</sup> | 0.85 ± 0.19 <sup>ab</sup> | 2.35 ± 0.45 <sup>ac</sup> |
| Tyrosine                               | 1.00 ± 0.15 <sup>a</sup> | 0.76 ± 0.14 <sup>a</sup>  | 1.27 ± 0.17 <sup>a</sup>  | 1.39 ± 0.15 <sup>a</sup> | 1.43 ± 0.19 <sup>a</sup>  | 1.96 ± 0.29 <sup>a</sup>  |
| Urate                                  | 1.00 ± 0.08 <sup>a</sup> | 0.80 ± 0.07 <sup>a</sup>  | 0.96 ± 0.19 <sup>a</sup>  | 1.41 ± 0.10 <sup>a</sup> | 1.45 ± 0.15 <sup>a</sup>  | 1.54 ± 0.24 <sup>a</sup>  |
| Urea                                   | 1.00 ± 0.12 <sup>a</sup> | 0.92 ± 0.12 <sup>a</sup>  | 4.39 ± 0.99 <sup>b</sup>  | 1.11 ± 0.16 <sup>a</sup> | 1.22 ± 0.32 <sup>a</sup>  | 4.47 ± 0.55 <sup>b</sup>  |
| Valine                                 | 1.00 ± 0.10 <sup>a</sup> | 0.77 ± 0.07 <sup>a</sup>  | 2.68 ± 0.38 <sup>b</sup>  | 1.34 ± 0.10 <sup>a</sup> | 1.37 ± 0.31 <sup>a</sup>  | 3.65 ± 0.51 <sup>b</sup>  |
| Xylose                                 | 1.00 ± 0.16 <sup>a</sup> | 0.91 ± 0.22 <sup>a</sup>  | 0.53 ± 0.05 <sup>a</sup>  | 0.90 ± 0.17 <sup>a</sup> | 0.65 ± 0.09 <sup>a</sup>  | 0.61 ± 0.16 <sup>a</sup>  |
| α,β-Trehalose                          | 1.00 ± 0.10 <sup>a</sup> | 0.83 ± 0.13 <sup>a</sup>  | 1.94 ± 0.54 <sup>a</sup>  | 0.79 ± 0.04 <sup>a</sup> | 0.97 ± 0.10 <sup>a</sup>  | 1.97 ± 0.28 <sup>b</sup>  |
| α-Methyl mannopyranoside               | 1.00 ± 0.28 <sup>a</sup> | 0.55 ± 0.14 <sup>a</sup>  | 0.42 ± 0.17 <sup>a</sup>  | 1.13 ± 0.32 <sup>a</sup> | 0.91 ± 0.27 <sup>a</sup>  | 0.50 ± 0.10 <sup>a</sup>  |
| β,β-Trehalose                          | 1.00 ± 0.08 <sup>a</sup> | 0.77 ± 0.14 <sup>a</sup>  | 0.80 ± 0.18 <sup>a</sup>  | 1.03 ± 0.10 <sup>a</sup> | 0.69 ± 0.09 <sup>a</sup>  | 0.83 ± 0.17 <sup>a</sup>  |
| Ascorbate/Dehydroascorbate (red/ox)    | 1.00 ± 0.29 <sup>a</sup> | 0.90 ± 0.21 <sup>a</sup>  | 1.54 ± 0.34 <sup>a</sup>  | 0.92 ± 0.18 <sup>a</sup> | 0.85 ± 0.22 <sup>a</sup>  | 0.88 ± 0.28 <sup>a</sup>  |
| Succinate/Fumarate                     | 1.00 ± 0.22 <sup>a</sup> | 1.07 ± 0.12 <sup>a</sup>  | 2.21 ± 0.34 <sup>b</sup>  | 0.98 ± 0.07 <sup>a</sup> | 1.20 ± 0.21 <sup>a</sup>  | 1.83 ± 0.16 <sup>b</sup>  |
| Aspartic acid/Asparagine               | 1.00 ± 0.30 <sup>a</sup> | 1.52 ± 0.52 <sup>a</sup>  | 0.84 ± 0.19 <sup>a</sup>  | 1.06 ± 0.33 <sup>a</sup> | 1.50 ± 0.43 <sup>a</sup>  | 1.19 ± 0.61 <sup>a</sup>  |
| Glutamic acid/Glutamine                | 1.00 ± 0.25 <sup>a</sup> | 1.29 ± 0.28 <sup>ab</sup> | 0.29 ± 0.02 <sup>ac</sup> | 0.42 ± 0.09 <sup>a</sup> | 0.62 ± 0.17 <sup>a</sup>  | 0.24 ± 0.02 <sup>a</sup>  |
